# Supplementary material for: Constructing a chemoenzymatic strategy for enhancing the efficiency of selectively transforming 5-hydroxymethylfurfural into furan carboxylic acids
Source: Royal Society of Chemistry journal article supplement (doi:10.1039/d4gc04735d), 2024-12-06
Supplement: d4gc04735d1.pdf [file d4gc04735d1.pdf]

## Supporting Information

### **Constructing a chemoenzymatic strategy for enhancing the efficiency of selectively transforming 5-hydroxymethylfurfural to furan carboxylic acid**

Zhiyu Zhang<sup>+a</sup>, Xiaowang Zhang<sup>+a</sup>, Siyu Qi<sup>a</sup>, Qi Na<sup>a</sup>, Kaichen Zhao<sup>a</sup>, Ziyi Yu<sup>b</sup>, Zhuotao Tan<sup>a\*</sup>, Hanjie Ying<sup>a</sup>, Chenjie Zhu<sup>a\*</sup>

<sup>a</sup>College of Biotechnology and Pharmaceutical Engineering, Nanjing Tech University, 30 S Puzhu Rd, 211816 Nanjing (China)

<sup>b</sup>State Key Laboratory of Materials-Oriented Chemical Engineering, College of Chemical Engineering, Nanjing Tech University, 30 S Puzhu Rd, 211816 Nanjing (China)

\* Corresponding author: joh\_yy@njtech.edu.cn, zhucj@njtech.edu.cn

<sup>+</sup>X. Z and Z.Z contributed equally to this paper.

# 1. General Materials and Methods

## 1.1 Materials

The nature flavin cofactor mimic catalysts (NFCMs) was synthesized according to our previous report.<sup>[1]</sup> Other reagents including NAD(P)<sup>+</sup>, HMF, HMFCA, FFCA, sodium alginate, methacrylic anhydride, N-Ethyl-N'-(3-dimethylaminopropyl)-carbodiimide (EDAC) and N-Hydroxysuccinimide (NHS) were purchased from Aladdin. Galactose oxidase was purchased from Sigma.

## 1.2 General equipment

NMR spectra were recorded on a Bruker Ascend 400 MHz NMR spectrometer at <sup>1</sup>H NMR (400 MHz) and <sup>13</sup>C NMR (100 MHz). HPLC (Waters) was equipped with a Aminex HPX-87H column (300 mm × 7.8 μm) or for product quantification.

## 1.3 Preparation and characterization of the artificial cofactors.

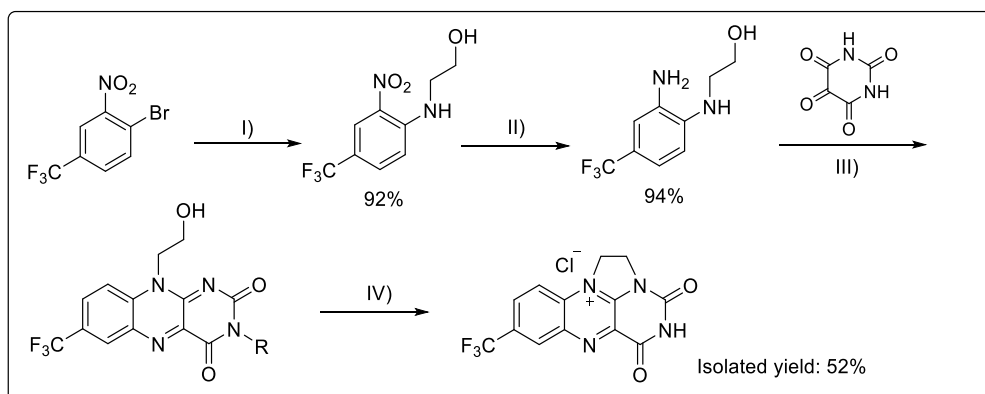

**Scheme S1.** General procedure for the synthesis of NFCM<sup>[1]</sup>. I) 2-aminoethanol, K<sub>2</sub>CO<sub>3</sub>, EtOH, reflux, 8 h; II) HCOONH<sub>4</sub>, Pd/C, MeOH, 0 °C, 1h; III) alloxan monohydrate or N-methyl alloxan monohydrate, B(OH)<sub>3</sub>, AcOH, 50 °C, overnight; IV) SOCl<sub>2</sub>, 50 °C, 20 h.

### 7-(Trifluoromethyl)-1,10-ethyleneisalloxazinium chloride

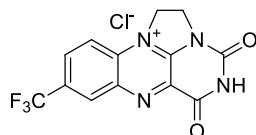

The catalyst 7-(trifluoromethyl)-1,10-ethyleneisalloxazinium chloride was synthesized from 4-bromo-3-nitrobenzotrifluoride according to Scheme S1, isolated as yellow solid; <sup>1</sup>H NMR (400 MHz, CF<sub>3</sub>COOD) δ 9.30 (s, 1H), 8.99 (d, *J* = 8.6 Hz, 1H), 8.70 (d, *J* = 8.8 Hz, 1H), 6.10 (t, *J* = 8.4 Hz, 2H), 5.48 (t, *J* = 8.5 Hz, 2H); <sup>13</sup>C NMR (100 MHz, CF<sub>3</sub>COOD) δ 158.7, 146.2, 144.9, 140.9, 136.7, 135.5 (q, *J* = 36 Hz, C7-F), 133.5,

131.4, 131.1, 122.2 (d,  $J = 271$  Hz, CF<sub>3</sub>), 118.5, 51.9, 45.9.

#### **1.4. Enzyme preparation, purification and assay**

The evolved unspecific peroxygenase from *Agrocybe aegerita* (rAaeUPO) (EC 1.11.2.1) was expressed in *Pichia pastoris* and purified as described previously.<sup>[1]</sup> The yeast culture containing rAaeUPO was clarified by centrifugation at 10000 rpm for 1 hour at 4 °C. The supernatant was filtered through a 20 µm filter and concentrated and dialyzed against 100 mM sodium phosphate, pH 7.0. Then the saturated ammonium sulfate solution was slowly added to give a 40% saturated solution at 4 °C. The suspension was again centrifuged at 12000 rpm for 30 min at 4 °C to discard precipitated protein. The supernatant was concentrated with 30 kDa ultrafiltration tubes and then washed with 50 mM sodium phosphate buffer, pH 7.0 and stored at -80 °C. The activity of rAaeUPO was  $270 \pm 5$  U mg<sup>-1</sup> (pH 5.0 in Kpi buffer). One unit of the enzyme activity was defined as the amount of the enzyme catalyzing the oxidation of 1 µmol of ABTs per minute.

The preparation, purification and assay of alcohol dehydrogenase (ADH) (gene ID: 100034242) from horse liver was conducted according to our previous report <sup>[2]</sup>. The protein concentration was determined by the Bradford method using bovine serum albumin as standard.

#### **1.5 Hydrogel preparation**

Firstly, 1 g sodium alginate was dissolved in 50 mL deionized water and followed by 7.14 mL methacrylic anhydride. The pH of the mixture was adjusted to 8.0 with 5 mol/L NaOH solution, and then the reaction solution was stirred at 0°C for 24 h (600 rpm/min). When the reaction was over, the polymer product was washed with ethanol, and then dried in vacuum at 40°C for 6 h to obtain double-bond sodium alginate (SA-MA). Finally, the hydrogel material was obtained by adding 2 mg of photoinitiator lithium phenyl phosphate to 5% w/v sodium alginate solution, and then irradiating the solution with 405 nm blue light for 3 min.

#### **1.6 Enzyme immobilization**

The enzyme hydrogel preparation process has been reported in our previous work.<sup>[2]</sup> Before the enzyme immobilizing, the synthetic hydrogel material was activated by using the mixture solution of EDAC (1 g/L) and NHS (2 g/L) for 2 h. Then, 1 g hydrogel material was washed in water for three times and added into 5 mL of 2 g/L enzyme solution. The mixture was shaken thoroughly and left to rest for 2 hours. Finally, the enzyme is smoothly fixed to the material,

and then washed and preserved in n-hexane.

### 1.7 Calculation of enzyme immobilization efficiency

The detailed calculation formula is as follows:

$$\text{Immobilization efficiency (\%)} = \frac{c(\text{initial}) - c(\text{free})}{c(\text{initial})}$$

The  $c(\text{initial})$  was defined as the initial concentration of enzyme.

The  $c(\text{free})$  was defined as the concentration of free enzyme after immobilization.

### 1.8 Quantification of the components in the reaction solution

The detailed calculation formula is as follows:

$$\text{Percentage (\%)} = \frac{c(\text{compound})}{c(\text{initial})}$$

The  $c(\text{compound})$  was defined as the concentration of corresponding compound.

The  $c(\text{initial})$  was defined as the initial concentration of substrate.

### 1.9 TON of enzymes

The detailed calculation formula is as follows:

$$\text{TON} = \frac{c(\text{product})}{c(\text{enzyme})}$$

The  $c(\text{product})$  was defined as the final concentration of target product in the reaction.

The  $c(\text{enzyme})$  was defined as the total concentration of enzymes used in the reaction.

### 1.10 The detection method for reaction

Conditions: HPLC (waters) was equipped with a Aminex HPX-87H column (300 mm × 7.8 μm) for product quantification. The injection volume was 10 μL with an autosampler. Mobile phase: 5 mM H<sub>2</sub>SO<sub>4</sub> aqueous solution, Flow rate = 0.5 mL/min. The temperature is 50 °C. The UV detection wavelength is 268 nm.

| Substrate | Retention time (min) |
|-----------|----------------------|
| HMF       | 30.8                 |
| DFP       | 38.3                 |
| HMFCFA    | 20.8                 |
| FFCA      | 21.4                 |
| FDCA      | 15.3                 |

### 1.11 Methods for detection of H<sub>2</sub>O<sub>2</sub>

#### Electrochemical method:

A self-assembled Prussian Blue (PB) modified electrode was used according to previous literature<sup>[1]</sup>. The 30  $\mu$ L aliquots were taken at periodic intervals and added into vessel of electrochemical workstation. The concentration of H<sub>2</sub>O<sub>2</sub> was determined according to the fluctuation of the electrical signal.

### 1.12 The oxidation of HMF and its derivatives by HLADH-NFCM system

0.1 mM NAD<sup>+</sup>, 0.02 mM NFCM, 10 mM HMF, 2  $\mu$ M HLADH were added into 1 mL phosphate buffer (50 mM, pH 7.0) in turn and shaken for 2 h at 30 °C. Aliquots (100  $\mu$ L) were taken at intervals and was diluted to 400  $\mu$ L with water. The sample was s further identified by HPLC.

### 1.13 The oxidation of HMF and its derivatives by UPO-NFCM system

10 mM NADH, 0.1 mM NFCM, 10 mM substrate, 1  $\mu$ M rAaeUPO were added into 1 mL phosphate buffer (50 mM, pH 7.0) in turn and shaken for 2 h at 30 °C. Aliquots (100  $\mu$ L) were taken at intervals and was diluted to 400  $\mu$ L with water. The sample was s further identified by HPLC.

### 1.14 The selectivity oxidation of HMF catalyzed by chemoenzymatic system.

*Condition for HMFCA:* 0.1 mM NAD<sup>+</sup>, 0.02 mM NFCM, 10 mM HMF, 2  $\mu$ M HLADH and 1  $\mu$ M rAaeUPO were added into 1 mL phosphate buffer (50 mM, pH 7.0) in turn and stirred (800 rpm) for 2 h at 30 °C. Aliquots (100  $\mu$ L) were taken at intervals and was diluted to 400  $\mu$ L with water. The sample was s further identified by HPLC.

*Condition for FFCA:* The one-pot, two-step method was applied. A mixture of HMF (10 mM), NAD<sup>+</sup> (0.1 mM), NFCM (0.02 mM) and were prepared in 50 mM phosphate buffer (pH 7.0). The reactions were initiated by the addition of HLADH solution (80 nM) and rAaeUPO solution (100 nM) in a total of 1 mL of aqueous medium. After HMF was completely transformed, HLADH and UPO were inactivated at high temperature, and then GOase (5  $\mu$ M) was added. Reaction mixtures (1 mL) were shaken at 300 rpm in 2 mL centrifuge tube vessels at 30 °C. Aliquots (100  $\mu$ L) were taken at intervals and was diluted to 400  $\mu$ L with water. The sample was s further identified by HPLC.

*Condition for FDCA:* The one-pot, two-step method was applied. A mixture of HMF (10 mM),  $\text{NAD}^+$  (0.1 mM), NFCM (0.02 mM) and were prepared in 50 mM phosphate buffer (pH 7.0). The reactions were initiated by the addition of HLADH solution (80 nM) and rAaeUPO solution (100 nM) in a total of 1 mL of aqueous medium. After HMF was completely transformed, the GOase (5  $\mu\text{M}$ ) was added. Reaction mixtures (1 mL) were shaken at 300 rpm in 2 mL centrifuge tube vessels at 30 °C. Aliquots (100  $\mu\text{L}$ ) were taken at intervals and was diluted to 400  $\mu\text{L}$  with water. The sample was s further identified by HPLC.

### **1.15 The selective oxidation of HMF catalyzed by immobilized enzymes.**

*Condition for HMFCA:* 0.1 mM  $\text{NAD}^+$ , 0.02 mM NFCM, 10 mM HMF were added into 2 mL phosphate buffer (50 mM, pH 7.0) in turn. The reactions were initiated by the addition of immobilized HLADH (160 nM) and rAaeUPO (200 nM), the mixture was stirred for 2 h at 30 °C. Aliquots (100  $\mu\text{L}$ ) were taken at intervals and was diluted to 400  $\mu\text{L}$  with water. The sample was further identified by HPLC.

*Condition for FFCA:* The one-pot, two-step method was applied. A mixture of HMF (10 mM),  $\text{NAD}^+$  (0.1 mM), NFCM (0.02 mM) were added into 2 mL phosphate buffer (50 mM, pH 7.0) in turn. The reactions were initiated by the addition of immobilized HLADH (160 nM) and rAaeUPO (200 nM), the mixture was stirred at 30 °C. After HMF was completely transformed, immobilized HLADH and rAaeUPO were taken out and washed for next batch, and the immobilized GOase (2  $\mu\text{M}$ ) was added. Reaction mixtures (2 mL) were shaken at 300 rpm in 5 mL centrifuge tube vessels at 30 °C. Aliquots (100  $\mu\text{L}$ ) were taken at intervals and was diluted to 400  $\mu\text{L}$  with water. The sample was s further identified by HPLC. When the reaction is over, the enzymes are removed and washed to be used in another batch.

*Condition for FDCA:* The one-pot, two-step method was applied. A mixture of HMF (10 mM),  $\text{NAD}^+$  (0.1 mM), NFCM (0.02 mM) were added into 2 mL phosphate buffer (50 mM, pH 7.0) in turn. The reactions were initiated by the addition of immobilized HLADH (320 nM) and rAaeUPO (300 nM), the mixture was stirred for 2 h at 30 °C. After HMF was completely transformed, the GOase (3  $\mu\text{M}$ ) was added. Reaction mixtures (1 mL) were shaken at 300 rpm in 5 mL centrifuge tube vessels at 30 °C. Aliquots (100  $\mu\text{L}$ ) were taken at intervals and was diluted to 400  $\mu\text{L}$  with water. The sample was s further identified by HPLC. When the reaction is over, the enzymes are removed and washed to be used in another batch.

### **1.16 Preparative procedure for furan carboxylic acid.**

The method for the isolation of HMFCA and FFCA is according to a protocol from the reported literature <sup>[17]</sup>. The reaction mixture was heated to 80 °C for 10 min and then frozen to -80 °C. The solid sample was freeze-dried with vacuum dryer to get solid mixture. The solid mixture is dissolved with 50 ml deionized water and centrifuged to remove the enzymes. The supernatant was cooled to 4 °C. The pH of supernatant was adjusted to 1.0 by adding of 50% H<sub>2</sub>SO<sub>4</sub>, followed by extraction 4 times with ethyl acetate. The organic solvent was removed through evaporation, thereby affording the product. The identity of products was confirmed by HPLC.

The method for the isolation of FDCA is according to a protocol from the reported literature <sup>[18]</sup>. The reaction mixture was heated to 80 °C for 10 min and then frozen to -80 °C. The solid sample was freeze-dried with vacuum dryer to get solid mixture. The solid mixture is dissolved with 50 mL deionized water and centrifuged to remove the enzymes. The supernatant was cooled to 0 °C and FDCA was precipitated by adding 50% H<sub>2</sub>SO<sub>4</sub> for adjusting the pH value to 1.0 at 2°C. The precipitate was obtained by filtration and washed once with ice-cold water. After air dry, the precipitate was re-dissolved in 100 ml of ethyl acetate. Then, the solvent was evaporated, then a dry powder was obtained. The identity of products was confirmed by HPLC.

## 2. Supplementary Figures and Tables

### Supplementary Tables

**Table S1.** The production of FFCA from HMF by immobilized enzymes.

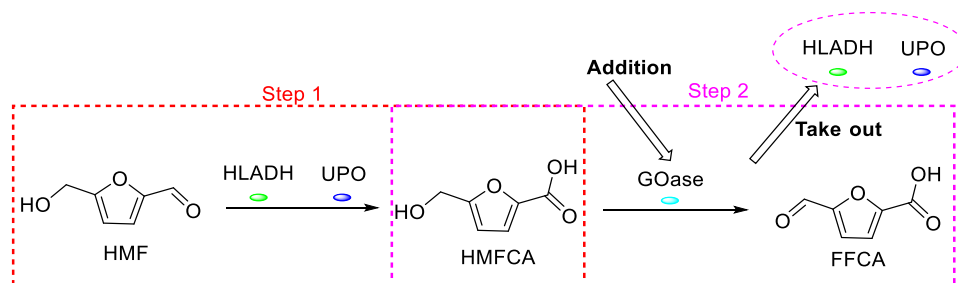

| Batch | Time [h] | Yield [%] |
|-------|----------|-----------|
| 1     | 8        | >99       |
| 2     | 8        | >99       |
| 3     | 8        | 98        |
| 4     | 8        | >99       |
| 5     | 10       | >99       |
| 6     | 10       | 98        |

Reaction conditions: 10 mM HMF, 0.02 mM NFCM, 0.1 mM NAD<sup>+</sup>, hydrogel containing 400 nM rAaeUPO and 320 nM rAaeUPO or 3 μM GOase were added into 2 mL phosphate buffer (50 mM, pH 7.0, 40% acetonitrile v/v) in turn and shaken for 2 h at 30 °C. After HMF was completely transformed, HLADH and rAaeUPO were taken out and washed for next batch. The yield of FFCA was quantified by HPLC, which was equipped with a Aminex HPX-87H column (300 mm × 7.8μm). The injection volume was 10 μL with an autosampler. Mobile phase: 5 mM H<sub>2</sub>SO<sub>4</sub> aqueous solution, Flow rate = 0.5 mL/min. The temperature is 50 °C. The UV detection wavelength is 268 nm.



**Table S2.** The production of FDCA from HMF by immobilized enzymes.

| Batch | Time [h] | Yield [%] |
|-------|----------|-----------|
| 1     | 28       | 98        |
| 2     | 28       | >99       |
| 3     | 30       | 98        |
| 4     | 30       | 98        |
| 5     | 36       | 98        |
| 6     | 40       | 97        |
| 7     | 42       | 63        |

Reaction conditions: 10 mM HMF, 0.02 mM NFCM, 0.1 mM NAD<sup>+</sup>, hydrogel containing 600 nM rAaeUPO and 480 nM rAaeUPO or 3 μM GOase were added into 2 mL phosphate buffer (50 mM, pH 7.0, 40% acetonitrile v/v) in turn and shaken for 2 h at 30 °C. The yield of FFCA was quantified by HPLC, which was equipped with a Aminex HPX-87H column (300 mm × 7.8μm). The injection volume was 10 μL with an autosampler. Mobile phase: 5 mM H<sub>2</sub>SO<sub>4</sub> aqueous solution, Flow rate = 0.5 mL/min. The temperature is 50 °C. The UV detection wavelength is 268 nm.

**Table S3.** The comparison of synthesis of HMFCa from HMF catalyzed by different enzymatic systems

| Entry | Enzyme            | TON          | $C_{(\text{enzyme})}$<br>[ $\mu\text{M}$ ] | Space-time<br>yield<br>[ $\text{g}_{\text{product}} \text{L}^{-1} \text{d}^{-1}$ ] | Atom<br>efficiency<br>[%] <sup>a</sup> | Selectivity<br>[%] | E-factor <sup>b</sup> | ref                  |
|-------|-------------------|--------------|--------------------------------------------|------------------------------------------------------------------------------------|----------------------------------------|--------------------|-----------------------|----------------------|
| 1     | HLADH             | 5333         | 2                                          | 0.51                                                                               | 88                                     | 81                 | 7.2                   | 3                    |
| 2     | ScCR              | 4167         | 33                                         | 3.15                                                                               | 89                                     | 96                 | 4.7                   | 4                    |
| 3     | Cal-B             | 126          | 250                                        | 5.04                                                                               | 88                                     | 80                 | 6.65                  | 5                    |
|       | BovALDH/E         |              |                                            |                                                                                    |                                        |                    |                       |                      |
| 4     | cALDH,<br>NOX     | 1600         | 15                                         | 2.29                                                                               | 89                                     | 91                 | 3.2                   | 6                    |
| 5     | HLADH,<br>rAaeUPO | <b>55000</b> | <b>0.18</b>                                | <b>2.52</b>                                                                        | <b>100</b>                             | <b>99</b>          | <b>2.7</b>            | <b>This<br/>work</b> |

<sup>a</sup>The atom efficiency (%) was calculated according to the following formula [13,14]:

$$\text{Atom efficiency (\%)} = \frac{\text{Weight of atom utilized}}{\text{Weight of reatants used in the reaction}}$$

<sup>b</sup>The E factor was determined as weight of the waste per kg of product according to the reported literature [15,16].

$$E\text{-factor} = \frac{\sum m(\text{catalysts}) - m(\text{product})}{\sum m(\text{product})}$$

**Table S4.** The comparison of synthesis of FFCA from HMF catalyzed by different enzymatic systems

| Entry | Enzyme                                | TON  | $C_{(\text{enzyme})}$<br>[ $\mu\text{M}$ ] | Space-time<br>yield<br>[ $\text{g}_{\text{product}} \text{L}^{-1} \text{d}^{-1}$ ] | Atom<br>efficiency<br>[%] <sup>a</sup> | Selectivity<br>[%] | E-factor <sup>b</sup> | ref                  |
|-------|---------------------------------------|------|--------------------------------------------|------------------------------------------------------------------------------------|----------------------------------------|--------------------|-----------------------|----------------------|
| 1     | laccase                               | 461  | 40                                         | 3                                                                                  | 89                                     | 82                 | 2.2                   | 7                    |
| 2     | CotA-TJ102                            | 6500 | -                                          | 2.66                                                                               | 89                                     | 98                 | 3.3                   | 8                    |
| 3     | PeAAO                                 | 600  | 5                                          | 2.52                                                                               | 70                                     | 98                 | 15                    | 9                    |
| 4     | SADH,<br>HRP,<br>scopoletin<br>HLADH, | 1385 | 69                                         | 6.86                                                                               | 89                                     | 97                 | - <sup>c</sup>        | 4                    |
| 5     | rAaeUPO,<br>GOase                     | 8250 | <b>1.2</b>                                 | <b>1.35</b>                                                                        | <b>80</b>                              | <b>99</b>          | <b>2.9</b>            | <b>This<br/>work</b> |

<sup>a</sup>The atom efficiency (%) was calculated according to the following formula <sup>[13,14]</sup>:

$$\text{Atom efficiency (\%)} = \frac{\text{Weight of atom utilited}}{\text{Weight of reatants used in the reaction}}$$

<sup>b</sup>The E-factor was determined as weight of the waste per kg of product according to the reported literature. <sup>[15,16]</sup>

$$E\text{-factor} = \frac{\sum m(\text{catalysts}) - m(\text{product})}{\sum m(\text{product})}$$

<sup>c</sup>Incalculable due to unknown products.

**Table S5.** The comparison of synthesis of FDCA from HMF catalyzed by different enzymatic systems

| Entry | Enzyme                                                | TON         | $C_{(\text{enzyme})}$<br>[ $\mu\text{M}$ ] | Space-<br>time yield<br>[ $\text{g}_{\text{product}} \text{L}^{-1} \text{d}^{-1}$ ] | Atom<br>efficiency<br>[%] <sup>a</sup> | Selectivity<br>[%] | E factor <sup>b</sup> | ref                  |
|-------|-------------------------------------------------------|-------------|--------------------------------------------|-------------------------------------------------------------------------------------|----------------------------------------|--------------------|-----------------------|----------------------|
| 1     | PeAAO<br>I500M/F501<br>W, CAT                         | 400         | 0.5                                        | 0.2                                                                                 | 60                                     | 50                 | 5.7                   | 10                   |
| 2     | PeAAO,<br>AaUPO                                       | 300         | 5.65                                       | 0.08                                                                                | 78                                     | 90                 | 13                    | 9                    |
| 3     | GO M <sub>3-5</sub> ,<br>HRP, CAT,<br>PaoABC<br>DdGO, | 112         | 42                                         | 46.8                                                                                | 75                                     | 99                 | 0.6                   | 11                   |
| 4     | HLADH,<br>HRP,<br>scopoletin<br>GO,                   | 1696        | 55                                         | 0.6                                                                                 | 82                                     | 95                 | - <sup>c</sup>        | 4                    |
| 5     | PeAAO,<br>AaUPO<br>HLADH,                             | 400         | 17                                         | 1                                                                                   | 78                                     | 80                 | 5.2                   | 12                   |
| 6     | rAaeUPO,<br>GOase                                     | <b>8250</b> | <b>1.2</b>                                 | <b>1.4</b>                                                                          | <b>89</b>                              | <b>99</b>          | <b>2.58</b>           | <b>This<br/>work</b> |

<sup>a</sup>The atom efficiency (%) was calculated according to the following formula <sup>[13,14]</sup>:

$$\text{Atom efficiency (\%)} = \frac{\text{Weight of atom utilited}}{\text{Weight of reatants used in the reaction}}$$

<sup>b</sup>The E-factor was determined as weight of the waste per kg of product according to the reported literature. <sup>[15,16]</sup>

<sup>c</sup> Incalculable due to unknown products.

**Table S6.** Semi-preparative synthesis of furan carboxylic acids from HMF

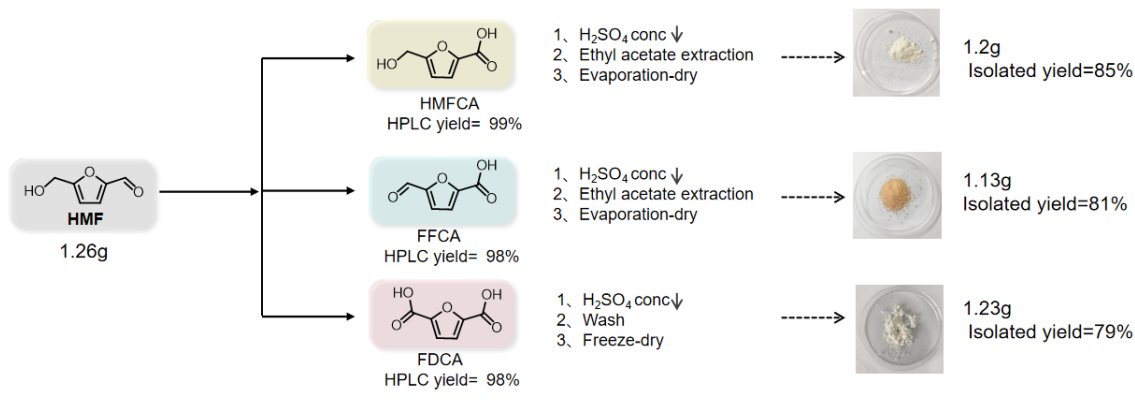

| Entry          | Substrate | Product | HPLC yield [%] | Isolated yield [g] (%) |
|----------------|-----------|---------|----------------|------------------------|
| 1 <sup>a</sup> | HMF       | HFMCa   | 99%            | 1.2 (85)               |
| 2 <sup>b</sup> | HMF       | FFCA    | 98%            | 1.13 (81)              |
| 3 <sup>c</sup> | HMF       | FDCA    | 98%            | 1.23 (79)              |

<sup>a</sup>For HMFCa. Reaction conditions: 0.1 mM NAD<sup>+</sup>, 0.02 mM NFCM, 10 mM HMF, 0.16 μM HLADH and 0.2 μM rAaeUPO were added into 1 L phosphate buffer (50 mM, pH 7.0) in turn.

<sup>b</sup>For FFCA. After HMF was completely transformed, HLADH and rAaeUPO were taken out and 2 μM GOase was added, the mixture was shaken at 30 °C (300 rpm).

<sup>c</sup>For FDCA. Reaction conditions: 0.24 μM HLADH and 0.3 μM rAaeUPO were used.

## Supplementary Figures

### 2.1 The effect of the continuous addition of H<sub>2</sub>O<sub>2</sub> on reactions

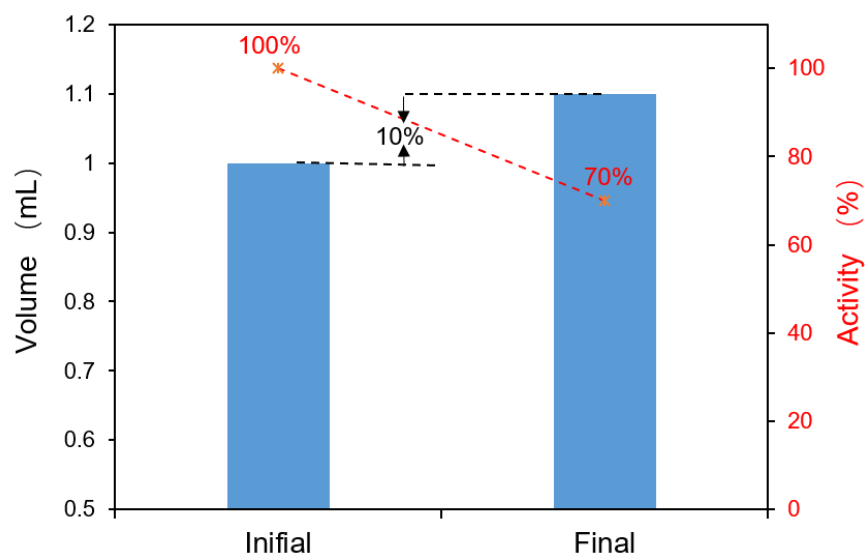

**Figure S1.** The effect of the continuous addition of H<sub>2</sub>O<sub>2</sub> on reactions.

## 2.2 The influence of pH on the efficiency of the chemoenzymatic reaction

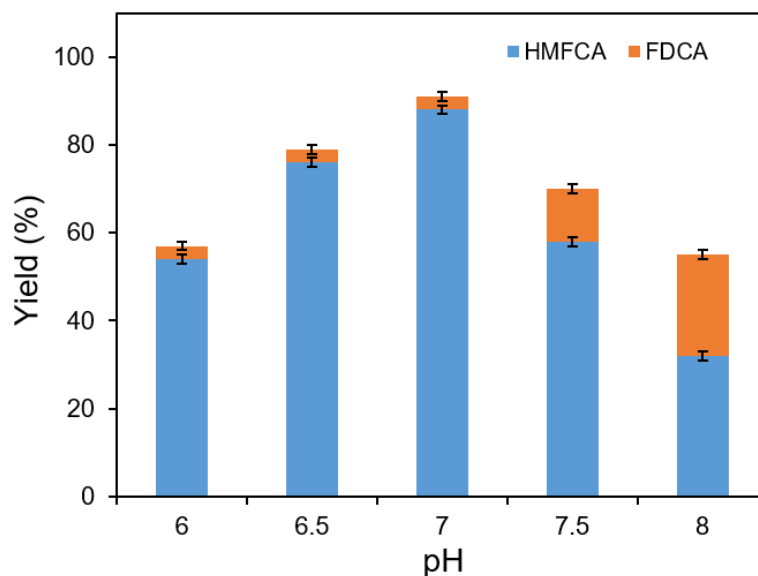

**Figure S2.** Reaction conditions: 10 mM HMF, 0.02 mM NFCM, 0.1 mM NAD<sup>+</sup>, 2 μM HLADH and 1 μM rAaeUPO were added into 2 mL phosphate buffer (50 mM, pH 6.0, 6.5, 7.0, 7.5, 8.0) in turn and shaken for 2 h at 30 °C.

## 2.3 The influence of concentration of rAaeUPO on the efficiency of the chemoenzymatic reaction

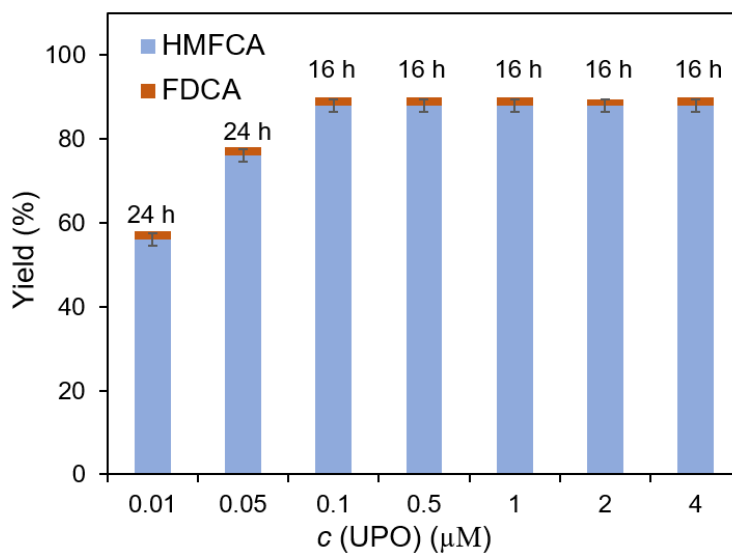

**Figure S3.** Reaction conditions: 10 mM HMF, 0.02 mM NFCM, 0.1 mM NAD<sup>+</sup>, 2 μM HLADH and 0.01-4 μM rAaeUPO were added into 2 mL phosphate buffer (50 mM, pH 7.0) in turn and shaken for 2 h at 30 °C.

## 2.4 The influence of concentration of HLADH on the efficiency of the chemoenzymatic reaction

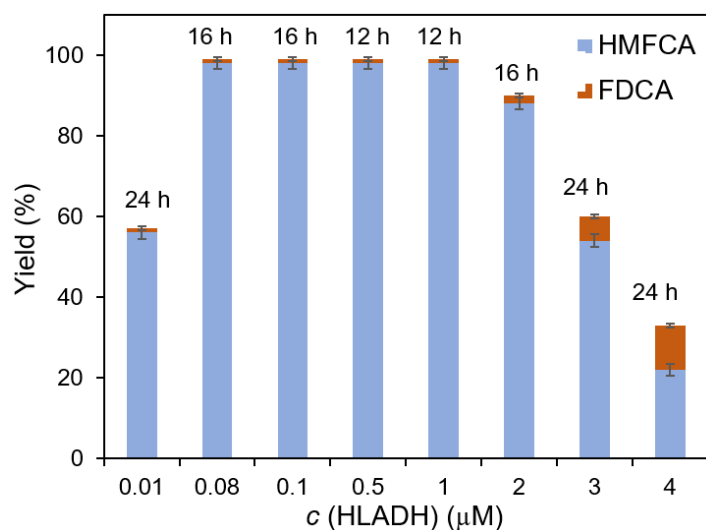

**Figure S4.** Reaction conditions: 10 mM HMF, 0.02 mM NFCM, 0.1 mM NAD<sup>+</sup>, 0.01-4 μM HLADH and 0.1 μM rAaeUPO were added into 2 mL phosphate buffer (50 mM, pH 7.0) in turn and shaken for 2 h at 30 °C.

## 2.5 The influence of concentration of NFCM on the efficiency of the chemoenzymatic reaction

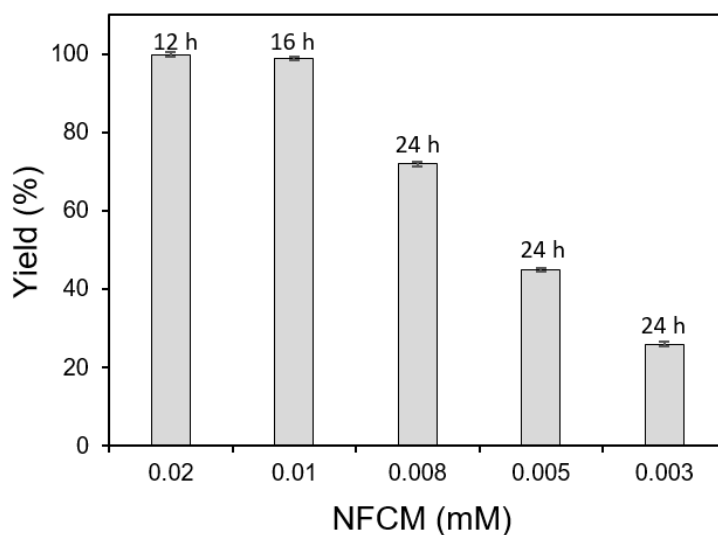

**Figure S5.** Reaction conditions: 10 mM HMF, 0.003-0.02 mM NFCM, 0.1 mM NAD<sup>+</sup>, 0.08 μM HLADH and 0.1 μM rAaeUPO were added into 2 mL phosphate buffer (50 mM, pH 7.0) in turn and shaken for 2 h at 30 °C.

## 2.6 The characterization of hydrogel material

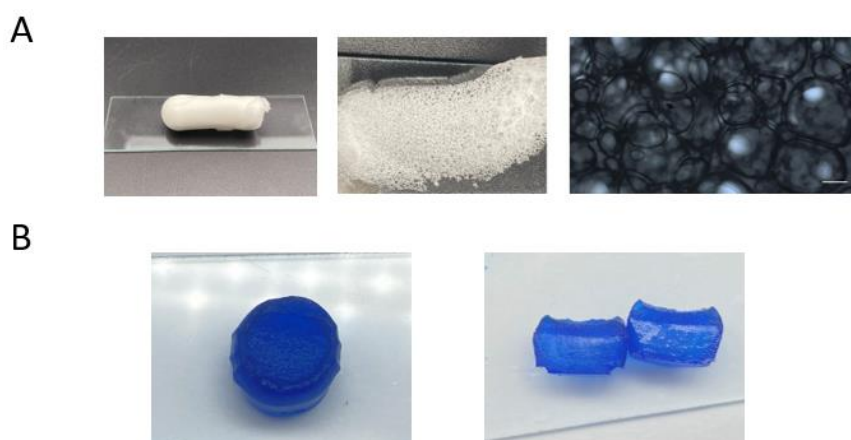

**Figure S6.** A) Microscopic structure of hydrogel material before immobilization; B) hydrogel material after enzyme immobilization and coomassie blue staining.

## 2.7 The oxidation of HMFCA catalyzed by GOase.

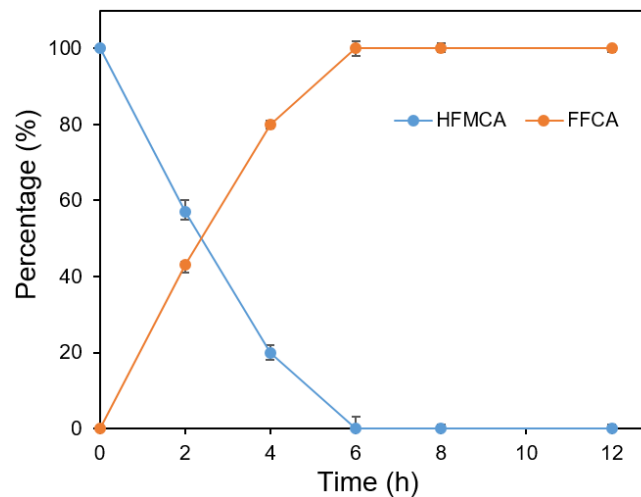

**Figure S7.** The oxidation of HMFCA catalyzed by GOase. Reaction conditions: 10 mM HMFCA, 5  $\mu$ M GOase were added into 2 mL phosphate buffer (50 mM, pH 7.0) in turn and shaken for 12 h at 30  $^{\circ}$ C.



## 2.8 Leaching retention ratio of immobilized enzyme from the hydrogel

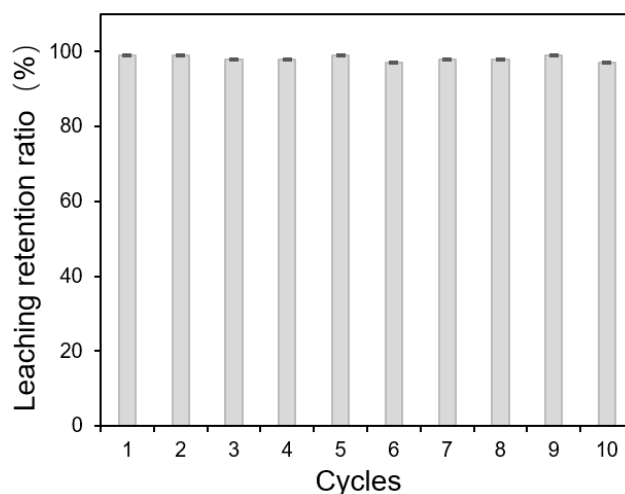

**Figure S8.** The leaching retention ratio of immobilized enzyme from the hydrogel. Conditions: 1 g of immobilized enzyme was soaked in 2 ml PBS buffer and left for 1 h to determine the amount of leached enzyme in the solution.

$$\text{Leaching retention ratio (\%)} = (E_1 - E_2) / E_1$$

$E_1$  : The initial amount of enzyme contained in 1g of immobilized enzyme;

$E_2$  : The amount of free enzyme leached in solution.

## 2.9 The expansion and reuse of soluble rAaeUPO-HLADH system.

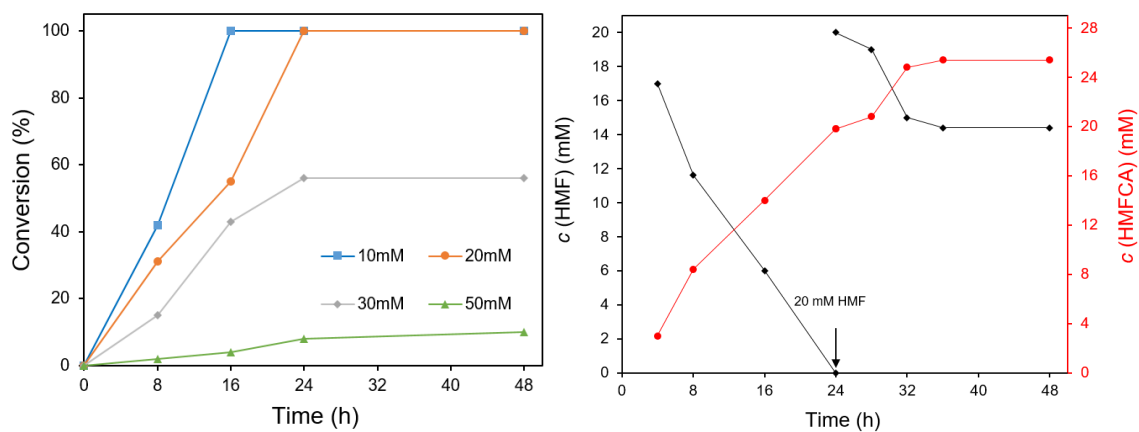

**Figure S9.** The the recyclability of soluble rAaeUPO-HLADH system.

## 2.10 Characterization and analysis of oxidation of HMF catalysed by *rAae*UPO-NFCM system

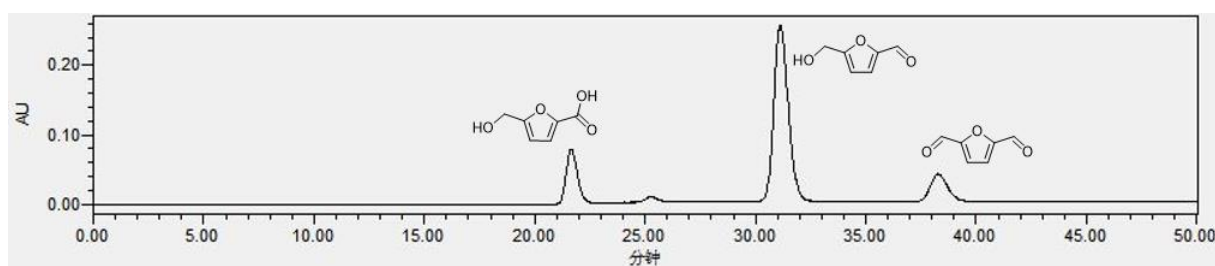

**Figure S10.** The reaction mixtures were identified by HPLC spectrum after 2 h.

## 2.11 Characterization and analysis of oxidation of HMF catalysed by *rAae*UPO-HLADH system

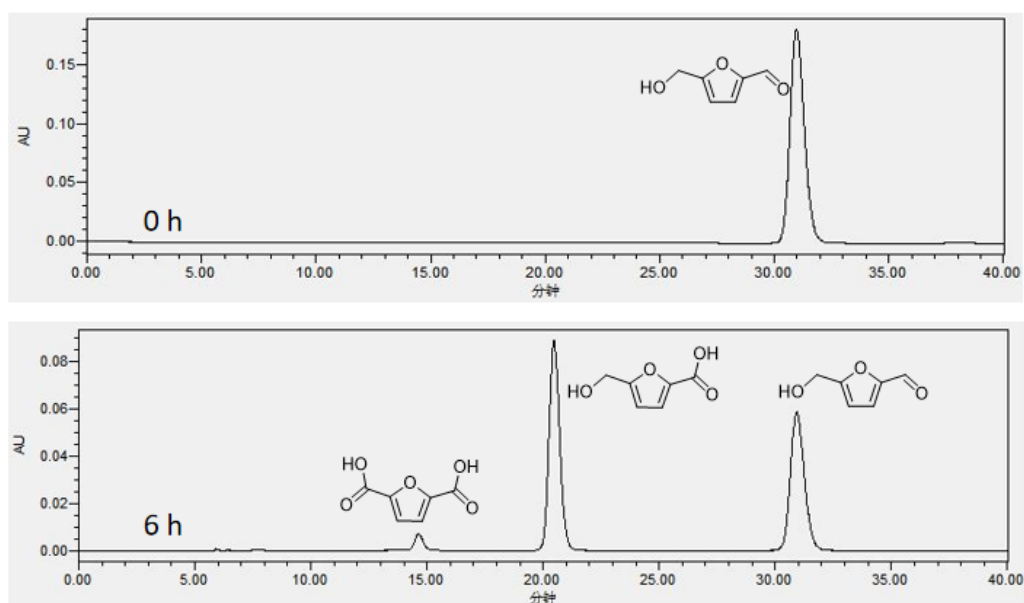

**Figure S11.** The reaction mixtures were identified by HPLC spectrum.

## 2.12 Characterization and analysis of oxidation of HMFCA catalysed by GOase

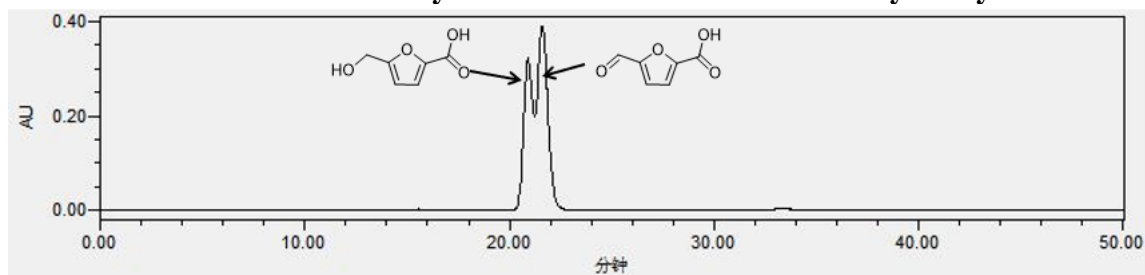

**Figure S12.** HPLC spectrum of reaction mixture of GOase-catalysed system after 2 h.

### 2.13 Characterization and analysis of oxidation of FFCA catalysed by rAaeUPO-HLADH system

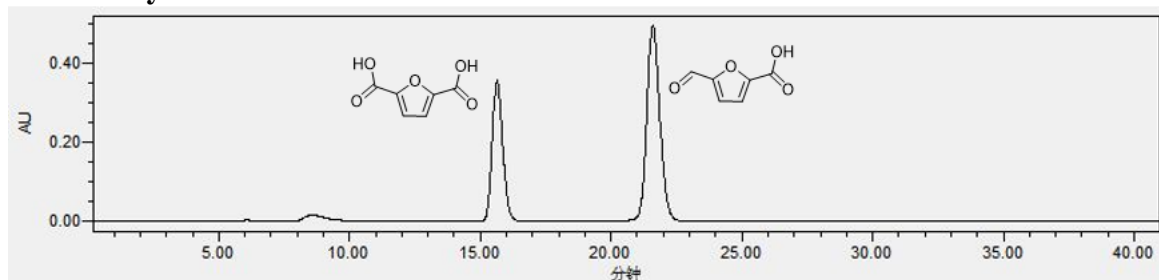

Figure S13. HPLC spectrum of reaction mixture of rAaeUPO-HLADH system after 4 h.

### 2.14 Characterization and analysis of oxidation of HMFCA catalysed by rAaeUPO-HLADH-GOase system

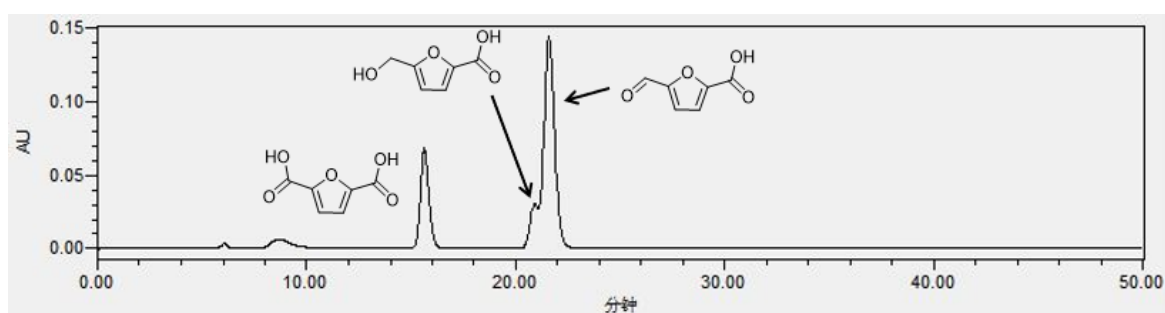

Figure S14. HPLC spectrum of reaction mixture of rAaeUPO-HLADH-GOase system after 4 h.

## 3. Spectrum

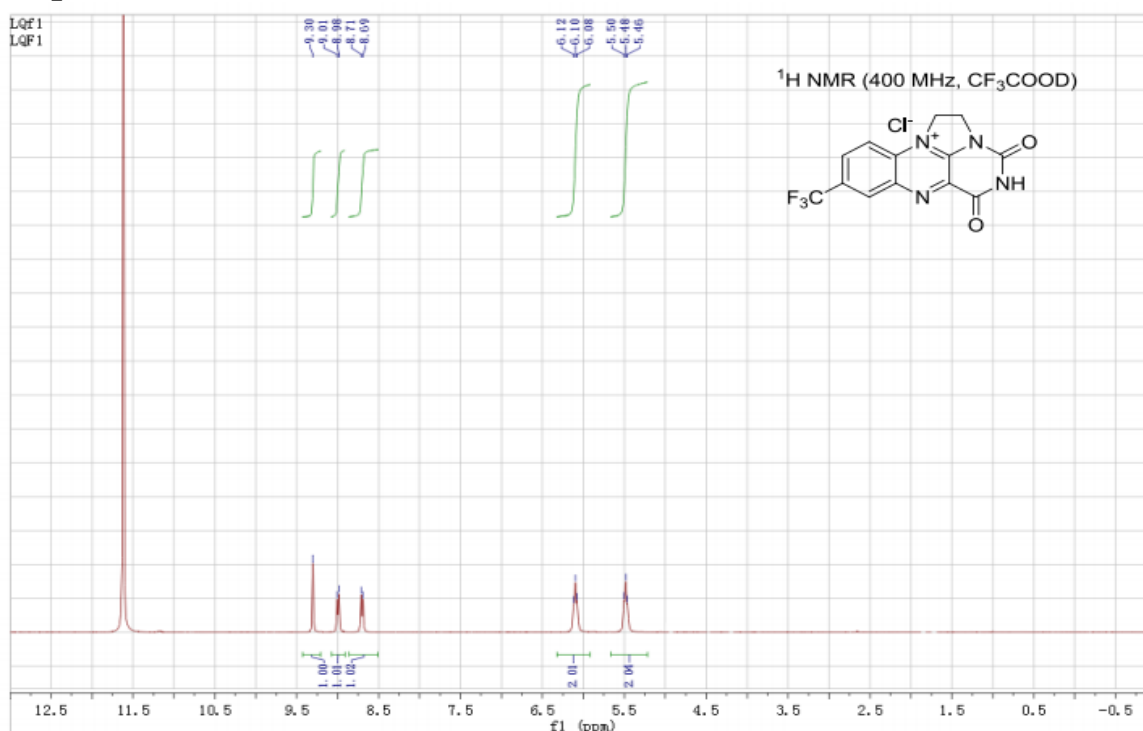

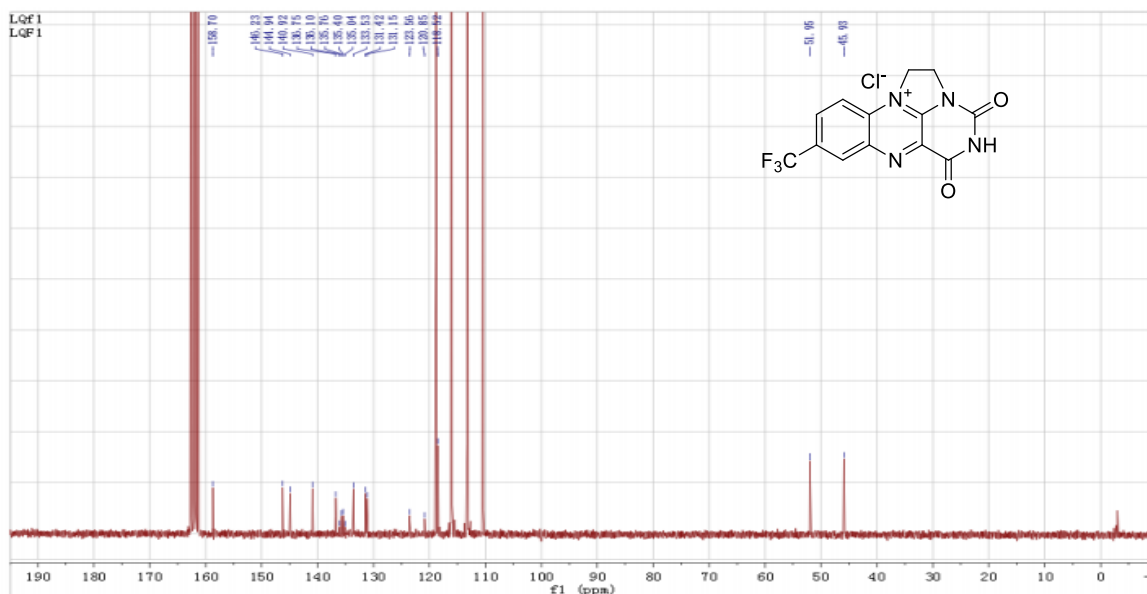

**Figure S15.**  $^1\text{H}$ ,  $^{13}\text{C}$  of NFCM.

#### 4. Reference

- [1] X. Zhang, Z. Tan, M. Xu, W. Zhuang, H. Ying, Zhenyu Chu, C. Zhu, *Green Synthesis and Catalysis*. **2024**, *5*, 153-158.
- [2] J. Zhang, Y. Zeng, Y. Heng, Y. Shen, X. Sun, Y. Wang, H. Zheng, M. Zeng, and Z. Yu, *Adv. Funct. Mater.* **2024**, *34*, 2400858-2400869.
- [3] H. Jia, M. Zong, H. Yu, and N. Li, *ChemSusChem* **2017**, *10*, 3524-3528.
- [4] H. Jia, M. Zong, G. Zheng and N. Li, *ChemSusChem* **2019**, *12*, 4764-4768.
- [5] M. Krystof, *ChemSusChem* **2013**, *6*, 826-830.
- [6] T. Knaus, V. Tseliou, L. D. Humphreys, N. S. Scrutton, and F. G. Mutti, *Green Chem.*, **2018**, *20*, 3931.
- [7] Ye. Qin, Y. Li, M. Zong, H. Wu and N. Li, *Green Chem*, **2015**, *17*, 3718-3723.
- [8] Zhang, C.; Chang, X.; Zhu, L.; Xing, Q.; You, S.; Qi, W.; Su, R.; He, Z. *Int. J. Biol. Macromol.* **2019**, *128*, 132–139.
- [9] J. Carro, P. Ferreira, L. Rodríguez, A. Prieto, A. Serrano, B. Balcells, A. Ardá J. Jiménez-Barbero, A. Gutiérrez, R. Ullrich, M. Hofrichter, *The FEBS journal*., **2015**, *282*, 3218-3229.
- [10] Serrano, A.; Calvino, E.; Carro, J.; Sanchez-Ruiz, M. I.; Canada, F. J.; Martinez, A. T. *Biotechnol. Biofuels*, **2019**, *12*, 217.
- [11] S. M. McKenna, P. Mines, P. Law, K. Kovacs-Schreiner, W. R. Birmingham, N. J. Turner, S. Leimkühl and A. J. Carnell, *Green Chem*, **2017**, *19*, 4660-4665.
- [12] A. Karich, S. B. Kleeberg, R. Ullrich and M. Hofrichter, *Microorganisms* **2018**, *6*, 1-12.
- [13] Roger A. Sheldon and John M. Woodley, *Chem. Rev.* **2018**, *118*, 801–838.

- [14] W. Fan, Y. Zhang, Y. Li, W. Zhang and D. Huang, *ChemSusChem* **2022**, 15, e202200529.
- [15] Steven K. Ma, John Gruber, Chris Davis, Lisa Newman, David Gray, Alica Wang, John Grate, Gjalb W. Huisman and Roger A. Sheldon, *Green Chem.*, **2010**, 12, 81–86.
- [16] J. An, Y. Wang, Z. Zhang, Z. Zhao, J. Zhang, and F. Wang, *Angew. Chem. Int. Ed.* **2018**, 57, 12308–12312.
- [17] X. Zhang, M. Zong and N. Li, *Green Chem.*, **2017**, 19, 4544.
- [18] Alexander Swoboda, Silvie Zwölfer, Zerina Duhović, Moritz Bürgler, Katharina Ebner, Anton Glieder, Wolfgang Kroutil, *ChemSusChem* **2024**, e202400156.
